# Supplementary material for: Medication-Related Hospital Admissions and Emergency Department Visits in Older People with Diabetes: A Systematic Review
Source: MDPI journal article supplement (doi:10.3390/jcm13020530), 2024-01-17
Supplement: s1 [file s1]

## Supplementary Materials

**Table S1: Embase Search Strategies and Results.**

Embase <1974 to October 20, 2023>

| Search Number | Search term                                                                         | Results   |
|---------------|-------------------------------------------------------------------------------------|-----------|
| 1             | side effect/                                                                        | 369,934   |
| 2             | adverse drug reaction/                                                              | 285,942   |
| 3             | medication error/                                                                   | 20,682    |
| 4             | Inappropriate Prescribing/                                                          | 5,056     |
| 5             | Polypharmacy/                                                                       | 24,058    |
| 6             | Adverse Reaction*.ti,ab,kf.                                                         | 69,748    |
| 7             | medication error*.ti,ab,kf.                                                         | 12,269    |
| 8             | ((medication adj2 related) or (medication adj2 problem*)).ti,ab,kf.                 | 11,572    |
| 9             | ((adverse adj2 reaction*) or (adverse adj2 event*)).ti,ab,kf.                       | 548,929   |
| 10            | ((drug adj2 related) or (drug adj2 problem*)).ti,ab,kf.                             | 51,900    |
| 11            | ((medicine adj2 related) or (medicine adj2 problem*)).ti,ab,kf.                     | 2,878     |
| 12            | potentially inappropriate prescription*.ti,ab,kf.                                   | 536       |
| 13            | potentially inappropriate medication*.ti,ab,kf.                                     | 2,795     |
| 14            | drug induced.ti,ab,kf.                                                              | 65,175    |
| 15            | Hypoglycemia/                                                                       | 94,258    |
| 16            | Hypoglyc*mi*.ti,ab,kf.                                                              | 102,460   |
| 17            | 1 or 2 or 3 or 4 or 5 or 6 or 7 or 8 or 9 or 10 or 11 or 12 or 13 or 14 or 15 or 16 | 1,244,668 |
| 18            | exp antidiabetic agent/                                                             | 599,719   |
| 19            | dipeptidyl peptidase IV inhibitor/                                                  | 14,197    |
| 20            | exp sulfonylurea/                                                                   | 18,620    |
| 21            | acarbose/                                                                           | 10,585    |
| 22            | exp glucagon like peptide 1 receptor agonist/                                       | 48,975    |
| 23            | insulin.ti,ab,kf.                                                                   | 557,369   |
| 24            | Metformin.ti,ab,kf.                                                                 | 48,086    |
| 25            | Sul*onylurea*.ti,ab,kf.                                                             | 17,166    |
| 26            | GLP*1RA.ti,ab,kf.                                                                   | 221       |
| 27            | SGLT2* inhibitor*.ti,ab,kf.                                                         | 8,522     |
| 28            | DPP* inhibitor*.ti,ab,kf.                                                           | 1,840     |
| 29            | 18 or 19 or 20 or 21 or 22 or 23 or 24 or 25 or 26 or 27 or 28                      | 848,769   |
| 30            | hospitalization/                                                                    | 535,491   |
| 31            | Emergency Service, Hospital/                                                        | 9,419     |
| 32            | hospital admission*.ti,ab,kf.                                                       | 87,571    |
| 33            | hospitali*.ti,ab,kf.                                                                | 566,526   |
| 34            | admission*.ti,ab,kf.                                                                | 508,450   |

|    |                                                                                                                                                                                                                                                                                                         |            |
|----|---------------------------------------------------------------------------------------------------------------------------------------------------------------------------------------------------------------------------------------------------------------------------------------------------------|------------|
| 35 | admitted.ti,ab,kf.                                                                                                                                                                                                                                                                                      | 472,800    |
| 36 | (emergency adj3 visit*).ti,ab,kf.                                                                                                                                                                                                                                                                       | 40,048     |
| 37 | (emergency adj3 service*).ti,ab,kf.                                                                                                                                                                                                                                                                     | 37,144     |
| 38 | acute care.ti,ab,kf.                                                                                                                                                                                                                                                                                    | 40,720     |
| 39 | 30 or 31 or 32 or 33 or 34 or 35 or 36 or 37 or 38                                                                                                                                                                                                                                                      | 1,534,481  |
| 40 | diabetes mellitus/                                                                                                                                                                                                                                                                                      | 706,723    |
| 41 | diabetes.ti,ab,kf.                                                                                                                                                                                                                                                                                      | 1,031,261  |
| 42 | T2D*.ti,ab,kf.                                                                                                                                                                                                                                                                                          | 87,708     |
| 43 | T1D*.ti,ab,kf.                                                                                                                                                                                                                                                                                          | 34,264     |
| 44 | 40 or 41 or 42 or 43                                                                                                                                                                                                                                                                                    | 1,260,211  |
| 45 | 17 and 29 and 39 and 44                                                                                                                                                                                                                                                                                 | 8,934      |
| 46 | limit 45 to (english language and yr="2000 -Current")                                                                                                                                                                                                                                                   | 8,160      |
| 47 | 46 not ((exp animal/ or exp invertebrate/ or nonhuman/ or animal experiment/ or animal tissue/ or animal model/ or exp plant/ or exp fungus/) not (exp human/ or human tissue/))                                                                                                                        | 8,126      |
| 48 | limit 47 to "remove medline records"                                                                                                                                                                                                                                                                    | 4,816      |
| 49 | case report/                                                                                                                                                                                                                                                                                            | 2,926,648  |
| 50 | conference paper/                                                                                                                                                                                                                                                                                       | 765,635    |
| 51 | editorial/                                                                                                                                                                                                                                                                                              | 751,223    |
| 52 | practice guideline/                                                                                                                                                                                                                                                                                     | 561,423    |
| 53 | newborn/                                                                                                                                                                                                                                                                                                | 605,820    |
| 54 | child/                                                                                                                                                                                                                                                                                                  | 2,115,397  |
| 55 | clinical trial/ or randomized controlled trial/ or controlled clinical trial/                                                                                                                                                                                                                           | 1,579,385  |
| 56 | conference review/ or "peer review"/ or "peer review organization"/ or "systematic review (topic)"/ or "medical record review"/ or "professional standards review organization"/ or "institutional review"/ or "systematic review"/ or "drug utilization review"/ or "utilization review"/ or "review"/ | 3,475,930  |
| 57 | 49 or 50 or 51 or 52 or 53 or 54 or 55 or 56                                                                                                                                                                                                                                                            | 11,337,281 |
| 58 | 48 not 57                                                                                                                                                                                                                                                                                               | 2,483      |

**Table S2: Medline Search Strategies and Results.**

Ovid MEDLINE(R) ALL <1946 to October 20, 2023>

| Search Number | Search term                                      | Results |
|---------------|--------------------------------------------------|---------|
| 1             | Drug-Related Side Effects and Adverse Reactions/ | 38,520  |
| 2             | Medication Errors/                               | 14,381  |
| 3             | Inappropriate Prescribing/                       | 4,638   |
| 4             | Polypharmacy/                                    | 6,742   |
| 5             | Adverse Reaction*.ti,ab,kf.                      | 44,035  |
| 6             | medication error*.ti,ab,kf.                      | 7,122   |

|    |                                                                                                         |         |
|----|---------------------------------------------------------------------------------------------------------|---------|
| 7  | ((medication adj2 related) or (medication adj2 problem*)).ti,ab,kf.                                     | 7,423   |
| 8  | ((adverse adj2 reaction*) or (adverse adj2 event*)).ti,ab,kf.                                           | 317,654 |
| 9  | ((drug adj2 related) or (drug adj2 problem*)).ti,ab,kf.                                                 | 33,132  |
| 10 | ((medicine adj2 related) or (medicine adj2 problem*)).ti,ab,kf.                                         | 2,229   |
| 11 | potentially inappropriate prescription*.ti,ab,kf.                                                       | 334     |
| 12 | potentially inappropriate medication*.ti,ab,kf.                                                         | 1,770   |
| 13 | drug induced.ti,ab,kf.                                                                                  | 47,365  |
| 14 | Hypoglycemia/                                                                                           | 30,601  |
| 15 | Hypoglyc*mi*.ti,ab,kf.                                                                                  | 67,843  |
| 16 | 1 or 2 or 3 or 4 or 5 or 6 or 7 or 8 or 9 or 10 or 11 or 12 or 13 or 14 or 15                           | 509,202 |
| 17 | hypoglycemic agents/ or dipeptidyl-peptidase iv inhibitors/ or sodium-glucose transporter 2 inhibitors/ | 83,646  |
| 18 | Insulin/                                                                                                | 199,748 |
| 19 | Metformin/                                                                                              | 18,047  |
| 20 | Sulfonylurea Compounds/                                                                                 | 6,682   |
| 21 | Acarbose/                                                                                               | 1,579   |
| 22 | insulin.ti,ab,kf.                                                                                       | 411,646 |
| 23 | GLP-1 Receptor Agonists.ti,ab,kf.                                                                       | 1,934   |
| 24 | Dipeptidyl-Peptidase IV Inhibitors.ti,ab,kf.                                                            | 414     |
| 25 | DPP* inhibitor*.ti,ab,kf.                                                                               | 953     |
| 26 | Metformin.ti,ab,kf.                                                                                     | 28,340  |
| 27 | Sul*onylurea*.ti,ab,kf.                                                                                 | 11,523  |
| 28 | 17 or 18 or 19 or 20 or 21 or 22 or 23 or 24 or 25 or 26 or 27                                          | 505,820 |
| 29 | Hospitalization/                                                                                        | 136,495 |
| 30 | Emergency Service, Hospital/                                                                            | 87,989  |
| 31 | hospital admission*.ti,ab,kf.                                                                           | 52,655  |
| 32 | hospitali*.ti,ab,kf.                                                                                    | 348,243 |
| 33 | admission*.ti,ab,kf.                                                                                    | 290,480 |
| 34 | admitted.ti,ab,kf.                                                                                      | 265,231 |
| 35 | (emergency adj3 visit*).ti,ab,kf.                                                                       | 25,354  |
| 36 | (emergency adj3 service*).ti,ab,kf.                                                                     | 26,478  |
| 37 | acute care.ti,ab,kf.                                                                                    | 28,640  |
| 38 | 29 or 30 or 31 or 32 or 33 or 34 or 35 or 36 or 37                                                      | 889,838 |
| 39 | Diabetes Mellitus/                                                                                      | 140,079 |
| 40 | diabetes.ti,ab,kf.                                                                                      | 670,839 |
| 41 | T2D*.ti,ab,kf.                                                                                          | 50,816  |
| 42 | T1D*.ti,ab,kf.                                                                                          | 17,047  |
| 43 | 39 or 40 or 41 or 42                                                                                    | 709,153 |
| 44 | 16 and 28 and 38 and 43                                                                                 | 2,770   |
| 45 | limit 44 to (english language and yr="2000 -Current")                                                   | 2,484   |
| 46 | 45 not (exp animals/ not humans.sh.)                                                                    | 2,479   |
| 47 | Randomized Controlled Trial/ or Clinical Trial/                                                         | 924,068 |

|    |                                                                                                                                                                                                                                                                                                                                                                                                                                                                    |           |
|----|--------------------------------------------------------------------------------------------------------------------------------------------------------------------------------------------------------------------------------------------------------------------------------------------------------------------------------------------------------------------------------------------------------------------------------------------------------------------|-----------|
| 48 | Utilization Review/ or Peer Review, Research/ or "Scientific Integrity Review"/ or "Systematic Review"/ or "Review"/ or review.mp. or "Rate Setting and Review"/ or "Peer Review"/ or "Ethical Review"/ or "Drug Utilization Review"/ or "Concurrent Review"/ or "Professional Review Organizations"/ or "Physician Payment Review Commission"/ or "Review Literature as Topic"/ or "Insurance Claim Review"/ or Peer Review, Health Care/ or "Medication Review"/ | 4,070,722 |
| 49 | Practice Guideline/ or Guideline/                                                                                                                                                                                                                                                                                                                                                                                                                                  | 37,994    |
| 50 | Case Reports/                                                                                                                                                                                                                                                                                                                                                                                                                                                      | 2,361,817 |
| 51 | Editorial/                                                                                                                                                                                                                                                                                                                                                                                                                                                         | 668,257   |
| 52 | Infant, Newborn/                                                                                                                                                                                                                                                                                                                                                                                                                                                   | 672,771   |
| 53 | Child/                                                                                                                                                                                                                                                                                                                                                                                                                                                             | 1,926,360 |
| 54 | 47 or 48 or 49 or 50 or 51 or 52 or 53                                                                                                                                                                                                                                                                                                                                                                                                                             | 9,520,228 |
| 55 | 46 not 54                                                                                                                                                                                                                                                                                                                                                                                                                                                          | 1,257     |

**Table S3: International Pharmaceutical Abstracts Search Strategies and Results.**

International Pharmaceutical Abstracts <1970 to January 6, 2023>

| Search Number | Search term                                                                                                      | Results |
|---------------|------------------------------------------------------------------------------------------------------------------|---------|
| 1             | Drug-Related Side Effects.mp. [mp=title, subject heading word, registry word, abstract, trade name/generic name] | 88      |
| 2             | Adverse Reactions.mp. [mp=title, subject heading word, registry word, abstract, trade name/generic name]         | 23,277  |
| 3             | 1 or 2                                                                                                           | 23,357  |
| 4             | Medication Errors.mp. [mp=title, subject heading word, registry word, abstract, trade name/generic name]         | 3,333   |
| 5             | Inappropriate Prescribing.mp. [mp=title, subject heading word, registry word, abstract, trade name/generic name] | 402     |
| 6             | Polypharmacy.mp. [mp=title, subject heading word, registry word, abstract, trade name/generic name]              | 1,538   |
| 7             | Adverse Reaction*.ti,ab.                                                                                         | 7,303   |
| 8             | medication error*.ti,ab.                                                                                         | 3,693   |
| 9             | ((medication adj2 related) or (medication adj2 problem*)).ti,ab.                                                 | 1,718   |
| 10            | ((adverse adj2 reaction*) or (adverse adj2 event*)).ti,ab.                                                       | 32,059  |
| 11            | ((drug adj2 related) or (drug adj2 problem*)).ti,ab.                                                             | 4,936   |
| 12            | ((medicine adj2 related) or (medicine adj2 problem*)).ti,ab.                                                     | 107     |
| 13            | potentially inappropriate prescription*.ti,ab.                                                                   | 47      |
| 14            | potentially inappropriate medication*.ti,ab.                                                                     | 286     |
| 15            | drug induced.ti,ab.                                                                                              | 3,083   |
| 16            | Hypoglycemia.mp. [mp=title, subject heading word, registry word, abstract, trade name/generic name]              | 2,790   |
| 17            | Hypoglyc*mi*.ti,ab.                                                                                              | 5,303   |

|    |                                                                                                                                                                                               |        |
|----|-----------------------------------------------------------------------------------------------------------------------------------------------------------------------------------------------|--------|
| 18 | 3 or 4 or 5 or 6 or 7 or 8 or 9 or 10 or 11 or 12 or 13 or 14 or 15 or 16 or 17                                                                                                               | 61,075 |
| 19 | (hypoglycemic agents or dipeptidyl-peptidase iv inhibitors or sodium-glucose transporter 2 inhibitors).mp. [mp=title, subject heading word, registry word, abstract, trade name/generic name] | 461    |
| 20 | Insulin.mp. [mp=title, subject heading word, registry word, abstract, trade name/generic name]                                                                                                | 13,012 |
| 21 | Metformin.mp. [mp=title, subject heading word, registry word, abstract, trade name/generic name]                                                                                              | 3,675  |
| 22 | Sulfonylurea Compounds.mp. [mp=title, subject heading word, registry word, abstract, trade name/generic name]                                                                                 | 3      |
| 23 | Acarbose.mp. [mp=title, subject heading word, registry word, abstract, trade name/generic name]                                                                                               | 458    |
| 24 | insulin.ti,ab.                                                                                                                                                                                | 12,120 |
| 25 | GLP-1 Receptor Agonists.ti,ab.                                                                                                                                                                | 162    |
| 26 | Dipeptidyl-Peptidase IV Inhibitors.ti,ab.                                                                                                                                                     | 38     |
| 27 | DPP* inhibitor*.ti,ab.                                                                                                                                                                        | 40     |
| 28 | Metformin.ti,ab.                                                                                                                                                                              | 3,041  |
| 29 | Sul*onylurea*.ti,ab.                                                                                                                                                                          | 1,330  |
| 30 | 19 or 20 or 21 or 22 or 23 or 24 or 25 or 26 or 27 or 28 or 29                                                                                                                                | 16,175 |
| 31 | Hospitalization.mp. [mp=title, subject heading word, registry word, abstract, trade name/generic name]                                                                                        | 6,127  |
| 32 | Emergency Service.mp. [mp=title, subject heading word, registry word, abstract, trade name/generic name]                                                                                      | 43     |
| 33 | hospital admission*.ti,ab.                                                                                                                                                                    | 2,026  |
| 34 | hospitali*.ti,ab.                                                                                                                                                                             | 12,986 |
| 35 | admission*.ti,ab.                                                                                                                                                                             | 7,859  |
| 36 | admitted.ti,ab.                                                                                                                                                                               | 6,066  |
| 37 | (emergency adj3 visit*).ti,ab.                                                                                                                                                                | 1,177  |
| 38 | (emergency adj3 service*).ti,ab.                                                                                                                                                              | 330    |
| 39 | "acute care".ti,ab.                                                                                                                                                                           | 1,118  |
| 40 | 31 or 32 or 33 or 34 or 35 or 36 or 37 or 38 or 39                                                                                                                                            | 23,847 |
| 41 | Diabetes Mellitus.mp. [mp=title, subject heading word, registry word, abstract, trade name/generic name]                                                                                      | 18,050 |
| 42 | diabetes.ti,ab.                                                                                                                                                                               | 19,992 |
| 43 | T2D*.ti,ab.                                                                                                                                                                                   | 1,516  |
| 44 | T1D*.ti,ab.                                                                                                                                                                                   | 196    |
| 45 | 41 or 42 or 43 or 44                                                                                                                                                                          | 22,959 |
| 46 | 18 and 30 and 40 and 45                                                                                                                                                                       | 313    |
| 47 | limit 46 to (english language and yr="2000 -Current")                                                                                                                                         | 266    |

**Table S4: Summary of the quality assessment for cross-sectional studies (n = 16).**

| Checklist for prevalence studies                                         | Sotiropoulos et al (2005) [1] | Feil et al (2011) [2] | Salutini et al (2015) [3] | Kim et al (2016) [4] | Mantovani et al (2016) [5]   | Conceição et al (2017) [6] | Mazzi et al (2017) [7] | Kaewput et al (2019) [8] | Müller et al (2020) [9] | Lee et al (2021) [10] | Nuzzo et al (2022) [11] | Chen et al (2022)[12] | Galea et al (2022) [13] | Galindo et al (2022) [14] | Yun et al (2022) [15] | Horii et al (2023) [16] |
|--------------------------------------------------------------------------|-------------------------------|-----------------------|---------------------------|----------------------|------------------------------|----------------------------|------------------------|--------------------------|-------------------------|-----------------------|-------------------------|-----------------------|-------------------------|---------------------------|-----------------------|-------------------------|
| Were the criteria for inclusion in the sample clearly defined?           | Yes                           | Yes                   | Yes                       | Yes                  | No                           | Yes                        | Yes                    | Yes                      | Yes                     | Yes                   | Yes                     | Yes                   | Yes                     | Yes                       | Yes                   | Yes                     |
| Were the study subjects and the setting described in detail?             | Yes                           | Yes                   | Yes                       | Yes                  | Yes                          | Yes                        | Yes                    | Yes                      | Yes                     | Yes                   | Yes                     | Yes                   | Yes                     | Yes                       | Yes                   | Yes                     |
| Was the exposure measured in a valid and reliable way?                   | Unclear                       | Yes                   | No                        | Yes                  | Yes                          | Yes                        | Yes                    | Yes                      | Yes                     | Yes                   | Yes                     | Yes                   | Yes                     | Yes                       | Yes                   | Yes                     |
| Were objective, standard criteria used for measurement of the condition? | Yes                           | Yes                   | Yes                       | Yes                  | Not applicable               | Yes                        | No                     | Yes                      | Yes                     | Yes                   | Yes                     | Yes                   | Yes                     | Yes                       | Yes                   | Yes                     |
| Were confounding factors identified?                                     | No                            | Yes                   | No                        | Yes                  | No                           | Yes                        | No                     | Yes                      | Yes                     | Yes                   | Yes                     | No                    | No                      | Yes                       | Yes                   | Yes                     |
| Were strategies to deal with confounding factors stated?                 | No                            | Yes                   | No                        | Yes                  | No                           | No                         | No                     | No                       | No                      | Yes                   | Yes                     | No                    | No                      | Yes                       | No                    | No                      |
| Were the outcomes measured in a valid and reliable way?                  | Yes                           | Yes                   | Yes                       | Yes                  | Yes                          | Yes                        | Yes                    | Yes                      | Yes                     | Yes                   | Yes                     | Yes                   | Yes                     | Yes                       | Yes                   | Yes                     |
| Was appropriate statistical analysis used?                               | Unclear                       | Yes                   | Yes                       | Yes                  | Yes                          | Yes                        | Yes                    | Yes                      | Yes                     | Yes                   | Yes                     | Yes                   | No                      | Yes                       | Yes                   | Yes                     |
|                                                                          | Yes=4;Unclear=2; No=2         | Yes=8                 | Yes=5; No=3               | Yes=8                | Yes=4;Not applicable=1; No=3 | Yes=7; No=1                | Yes=5; No=3            | Yes=7; No=1              | Yes=7; No=1             | Yes=8                 | Yes=8                   | Yes=6; No=2           | Yes=5; No=3             | Yes=8                     | Yes=7; No=1           | Yes=7; No=1             |
| Study quality                                                            | Moderate                      | High                  | Moderate                  | High                 | Moderate                     | High                       | Moderate               | High                     | High                    | High                  | High                    | Moderate              | Moderate                | High                      | High                  | High                    |

Scores can range from 0 to 8, each question is given a single score if the answer is Yes

Study quality: High quality: score ≥6, Moderate quality: score 4-5, Low quality: score ≤3

**Table S5: Summary of the quality assessment for cohort studies (n = 10).**

[illegible]

|                                                           |                              |                              |                              |                              |                              |                        |                              |                              |                              |                              |
|-----------------------------------------------------------|------------------------------|------------------------------|------------------------------|------------------------------|------------------------------|------------------------|------------------------------|------------------------------|------------------------------|------------------------------|
| follow up described and explored?                         |                              |                              |                              |                              |                              |                        |                              |                              |                              |                              |
| Were strategies to address incomplete follow up utilized? | Yes                          | Yes                          | Not applicable               | Yes                          | No                           | Yes                    | No                           | Yes                          | Yes                          | Yes                          |
| Was appropriate statistical analysis used?                | Yes                          | Yes                          | Yes                          | Yes                          | Yes                          | Yes                    | No                           | Yes                          | Yes                          | Yes                          |
|                                                           | Yes=7;Not applicable=2; No=2 | Yes=7;Not applicable=2; No=2 | Yes=8;Not applicable=1; No=2 | Yes=7;Not applicable=2; No=2 | Yes=8;Not applicable=2; No=1 | Yes=9;Not applicable=2 | Yes=7;Not applicable=2; No=2 | Yes=7;Not applicable=2; No=2 | Yes=8;Not applicable=2; No=1 | Yes=7;Not applicable=2; No=2 |
| Study quality                                             | Moderate                     | Moderate                     | High                         | Moderate                     | High                         | High                   | Moderate                     | Moderate                     | High                         | Moderate                     |

Scores can range from 0 to 11, each question is given a single score if the answer is Yes

Study quality: High quality: score ≥8, Moderate quality: score 5-7, Low quality: score ≤4



**Table S6: Summary of the quality assessment for prevalence studies (n = 6).**

| Checklist for prevalence studies                                                             | Greco et al (2010)<br>[27] | Nazish et al (2014)<br>[28] | Namba et al (2018)<br>[29] | Caballero-<br>Corchuelo et al<br>(2019)<br>[30] | Pereira et al (2020)<br>[31] | Poret et al (2022)<br>[32] |
|----------------------------------------------------------------------------------------------|----------------------------|-----------------------------|----------------------------|-------------------------------------------------|------------------------------|----------------------------|
| Was the sample frame appropriate to address the target population?                           | Yes                        | Yes                         | Yes                        | Yes                                             | Yes                          | Yes                        |
| Were study participants sampled in an appropriate way?                                       | Yes                        | Yes                         | Yes                        | Yes                                             | Yes                          | Yes                        |
| Was the sample size adequate?                                                                | Yes                        | Yes                         | Yes                        | Yes                                             | Yes                          | Yes                        |
| Were the study subjects and the setting described in detail?                                 | Yes                        | No                          | Yes                        | Yes                                             | No                           | Yes                        |
| Was the data analysis conducted with sufficient coverage of the identified sample?           | Unclear                    | Yes                         | Yes                        | Yes                                             | Yes                          | Yes                        |
| Were valid methods used for the identification of the condition?                             | Yes                        | No                          | Yes                        | Yes                                             | Yes                          | Yes                        |
| Was the condition measured in a standard, reliable way for all participants?                 | Yes                        | No                          | Yes                        | Yes                                             | Yes                          | Yes                        |
| Was there appropriate statistical analysis?                                                  | Yes                        | No                          | Yes                        | Yes                                             | No                           | Yes                        |
| Was the response rate adequate, and if not, was the low response rate managed appropriately? | Yes                        | Yes                         | Yes                        | Yes                                             | Yes                          | Yes                        |
|                                                                                              | Yes=8; Unclear 1           | Yes=5; No=4                 | Yes=9                      | Yes=9                                           | Yes=7;No=2                   | Yes=9                      |
| Study quality                                                                                | High                       | Moderate                    | High                       | High                                            | High                         | High                       |

Scores can range from 0 to 9, each question is given a single score if the answer is Yes

Study quality: High quality: score  $\geq 7$ , Moderate quality: score 4-6, Low quality: score  $\leq 3$

**Supplementary Table S7: Summary of the quality assessment for case-control studies (n = 3).**

| Checklist for prevalence studies                                                                              | Liatis et al (2015)[33] | Park et al (2018)[34] | Bengtson et al (2021)[35] |
|---------------------------------------------------------------------------------------------------------------|-------------------------|-----------------------|---------------------------|
| Were the groups comparable other than the presence of disease in cases or the absence of disease in controls? | No                      | Yes                   | Yes                       |
| Were cases and controls matched appropriately?                                                                | No                      | Yes                   | Yes                       |
| Were the same criteria used for identification of cases and controls?                                         | No                      | Yes                   | Yes                       |
| Was exposure measured in a standard, valid and reliable way?                                                  | Yes                     | Yes                   | Yes                       |
| Was exposure measured in the same way for cases and controls?                                                 | Yes                     | Yes                   | Yes                       |
| Were confounding factors identified?                                                                          | No                      | No                    | No                        |
| Were strategies to deal with confounding factors stated?                                                      | No                      | No                    | No                        |
| Were outcomes assessed in a standard, valid and reliable way for cases and controls?                          | Yes                     | Yes                   | Yes                       |
| Was the exposure period of interest long enough to be meaningful?                                             | Yes                     | Yes                   | Yes                       |
| Was appropriate statistical analysis used?                                                                    | Yes                     | Yes                   | Yes                       |
|                                                                                                               | Yes=5; No=5             | Yes=8; No=2           | Yes=8; No=2               |
| Study quality                                                                                                 | Moderate                | High                  | High                      |

Scores can range from 0 to 10, each question is given a single score if the answer is Yes

Study quality: High quality: score  $\geq 7$ , Moderate quality: score 5-6, Low quality: score  $\leq 4$

## References

1. Sotiropoulos, A.; Skliros, E.; Tountas, C.; Apostolou, U.; Peppas, T.; Pappas, S. Risk factors for severe hypoglycaemia in type 2 diabetic patients admitted to hospital in Piraeus, Greece. *EMHJ-East. Mediterr. Health J.* **2005**, *11*, 485-489.
1. Feil, D.G.; Rajan, M.; Soroka, O.; Tseng, C.-L.; Miller, D.R.; Pogach, L.M. Risk of hypoglycemia in older veterans with dementia and cognitive impairment: implications for practice and policy. *J. Am. Geriatr. Soc.* **2011**, *59*, 2263-2272.
2. Salutini, E.; Bianchi, C.; Santini, M.; Dardano, A.; Daniele, G.; Penno, G.; Miccoli, R.; Del Prato, S. Access to emergency room for hypoglycaemia in people with diabetes. *Diabetes Metab Res Rev* **2015**, *31*, 745-751. <https://doi.org/10.1002/dmrr.2667>.
3. Kim, H.M.; Seong, J.M.; Kim, J. Risk of hospitalization for hypoglycemia among older Korean people with diabetes mellitus: Interactions between treatment modalities and comorbidities. *Med. (Baltim. )* **2016**, *95*, e5016.
4. Mantovani, A.; Grani, G.; Chioma, L.; Vancieri, G.; Giordani, I.; Rendina, R.; Rinaldi, M.E.; Andreadi, A.; Coccaro, C.; Boccardo, C. Severe hypoglycemia in patients with known diabetes requiring emergency department care: A report from an Italian multicenter study. *J. Clin. Transl. Endocrinol.* **2016**, *5*, 46-52.
5. Conceição, J.; Dore, J.; Araújo, F.; Lares, P.A.; Carr, R.D.; Brodovicz, K.; Radican, L.; Nogueira, A.M. Severe hypoglycaemia among patients with type 2 diabetes requiring emergency hospital admission: The Hypoglycaemia In Portugal Observational Study—Emergency Room (HIPOS-ER). *Diabetes Obes. Metab.* **2018**, *20*, 50-59.
6. Mazzi, S.; Ravasio, R.; Forlani, G.; Veronese, G.; Fabbri, A.; Marchesini, G. Estimating the risk of severe hypoglycemic event related to glucose-lowering treatment among Italian patients with diabetes: the HYPOTHESIS database. *Clin. Outcomes Res.* **2017**, 711-720.
7. Kaewput, W.; Thongprayoon, C.; Varothai, N.; Sirirungreung, A.; Rangsri, R.; Bathini, T.; Mao, M.A.; Cheungpasitporn, W. Prevalence and associated factors of hospitalization for dysglycemia among elderly type 2 diabetes patients: A nationwide study. *World J. Diabetes* **2019**, *10*, 212.
8. Müller, N.; Lehmann, T.; Klöss, A.; Günster, C.; Kloos, C.; Müller, U.A. Changes in incidence of severe hypoglycaemia in people with type 2 diabetes from 2006 to 2016: analysis based on health insurance data in Germany considering the anti-hyperglycaemic medication. *Diabet. Med.* **2020**, *37*, 1326-1332.
9. Lee, S.E.; Kim, K.-A.; Son, K.J.; Song, S.O.; Park, K.H.; Park, S.H.; Nam, J.Y. Trends and risk factors in severe hypoglycemia among individuals with type 2 diabetes in Korea. *Diabetes Res. Clin. Pract.* **2021**, *178*, 108946.
10. Nuzzo, A.; Brignoli, A.; Ponziani, M.C.; Zavattaro, M.; Prodham, F.; Castello, L.M.; Avanzi, G.C.; Marzullo, P.; Aimaretti, G. Aging and comorbidities influence the risk of hospitalization and mortality in diabetic patients experiencing severe hypoglycemia. *Nutr. Metab. Cardiovasc. Dis.* **2022**, *32*, 160-166.
11. Chen, N.-C.; Chen, C.-L.; Shen, F.-C. The Risk Factors of Severe Hypoglycemia in Older Patients with Dementia and Type 2 Diabetes Mellitus. *J. Pers. Med.* **2022**, *12*, 67.
12. Galea, A.; Farrugia, S.; Calleja, N.; Coppini, D.V. Risk factors and outcomes of severe hypoglycaemia requiring hospital admission: a retrospective study. *Pract. Diabetes* **2022**, *39*, 19.
13. Galindo, R.J.; Ali, M.K.; Funni, S.A.; Dodge, A.B.; Kurani, S.S.; Shah, N.D.; Umpierrez, G.E.; McCoy, R.G. Hypoglycemic and hyperglycemic crises among US adults with diabetes and end-stage kidney disease: Population-based study, 2013–2017. *Diabetes Care* **2022**, *45*, 100-107.
14. Yun, J.S.; Han, K.; Ko, S.H. Trends of severe hypoglycemia in patients with type 2 diabetes in Korea: A longitudinal nationwide cohort study. *J. Diabetes Investig.* **2022**, *13*, 1438-1443.
15. Horii, T.; Otsuka, M.; Yasu, T. Risk of non-hypoglycemic agents for hypoglycemia-related hospitalization in patients with type 2 diabetes: a large-scale medical receipt database analysis. *BMJ Open Diabetes Res. Care* **2023**, *11*. <https://doi.org/10.1136/bmjdr-2022-003177>.
16. Tschöpe, D.; Bramlage, P.; Binz, C.; Krekler, M.; Deeg, E.; Gitt, A.K. Incidence and predictors of hypoglycaemia in type 2 diabetes—an analysis of the prospective DiaRegis registry. *BMC Endocr. Disord.* **2012**, *12*, 1-9.
17. Fu, H.; Xie, W.; Curtis, B.; Schuster, D. Identifying factors associated with hypoglycemia-related hospitalizations among elderly patients with T2DM in the US: a novel approach using influential variable analysis. *Curr. Med. Res. Opin.* **2014**, *30*, 1787-1793.
18. Hung, Y.; Lin, C.; Chen, H.; Chang, M.; Huang, K.; Chen, Y.; Chen, C. Severe hypoglycemia and hip fracture in patients with type 2 diabetes: a nationwide population-based cohort study. *Osteoporos. Int.* **2017**, *28*, 2053-2060.
19. Zhong, V.W.; Juhaeri, J.; Cole, S.R.; Kontopantelis, E.; Shay, C.M.; Gordon-Larsen, P.; Mayer-Davis, E.J. Incidence and trends in hypoglycemia hospitalization in adults with type 1 and type 2 diabetes in England, 1998–2013: a retrospective cohort study. *Diabetes Care* **2017**, *40*, 1651-1660.
20. Misra-Hebert, A.D.; Pantalone, K.M.; Ji, X.; Milinovich, A.; Dey, T.; Chagin, K.M.; Bauman, J.M.; Kattan, M.W.; Zimmerman, R.S. Patient characteristics associated with severe hypoglycemia in a type 2 diabetes cohort in a large, integrated health care system from 2006 to 2015. *Diabetes Care* **2018**, *41*, 1164-1171.
21. Andreano, A.; Bosio, M.; Russo, A.G. Emergency attendance for acute hyper- and hypoglycaemia in the adult diabetic population of the metropolitan area of Milan: quantifying the phenomenon and studying its predictors. *BMC Endocr. Disord.* **2020**, *20*, 1-14.
22. McCoy, R.G.; Lipska, K.J.; Van Houten, H.K.; Shah, N.D. Association of cumulative multimorbidity, glycemic control, and medication use with hypoglycemia-related emergency department visits and hospitalizations among adults with diabetes. *JAMA Netw. Open* **2020**, *3*, e1919099-e1919099.

23. Jensen, M.H.; Hejlesen, O.; Vestergaard, P. Epidemiology of hypoglycaemic episodes leading to hospitalisations in Denmark in 1998–2018. *Diabetologia* **2021**, *64*, 2193–2203.
24. Lacy, M.E.; Whitmer, R.A.; Lee, S.J.; Rushakoff, R.J.; Pletcher, M.J. Identifying Potential Intervention Points for Acute Hypoglycemic Events in Patients With Type 2 Diabetes Using Retrospective Clinical Data. *Clin. Diabetes* **2021**, *39*, 304–312.
25. Pilla, S.J.; Kraschnewski, J.L.; Lehman, E.B.; Kong, L.; Francis, E.; Poger, J.M.; Bryce, C.L.; Maruthur, N.M.; Yeh, H.-C. Hospital utilization for hypoglycemia among patients with type 2 diabetes using pooled data from six health systems. *BMJ Open Diabetes Res. Care* **2021**, *9*, e002153.
26. Greco, D.; Pisciotto, M.; Gambina, F.; Maggio, F. Severe hypoglycaemia leading to hospital admission in type 2 diabetic patients aged 80 years or older. *Exp. Clin. Endocrinol. Diabetes* **2010**, *118*, 215–219.
27. Nazish, Z.; Inayatullah, M.; Mustafa, F. Risk factors of hypoglycemia in diabetics. In Proceedings of the Medical Forum Monthly, 2014; pp. 38–42.
28. Namba, M.; Iwakura, T.; Nishimura, R.; Akazawa, K.; Matsuhisa, M.; Atsumi, Y.; Satoh, J.; Yamauchi, T. The current status of treatment-related severe hypoglycemia in Japanese patients with diabetes mellitus: A report from the committee on a survey of severe hypoglycemia in the Japan Diabetes Society. *J. Diabetes Investig.* **2018**, *9*, 642–656.
29. Caballero-Corchuelo, J.; Guerrero-Perez, F.; Garcia-Sancho de la Jordana, P.; Perez-Maraver, M. Analysis of the characteristics of patients with diabetes mellitus who attend a tertiary hospital emergency department for a hypoglycemic event. *Endocrinol Diabetes Nutr (Engl Ed)* **2019**, *66*, 19–25.
30. Pereira, C.A.; Almeida, R.; Dores, J. Characteristics of hypoglycaemic episodes in diabetic patients treated at the emergency room of a Portuguese tertiary centre, 2012 – 2016. *Endocrinol. Diabetes Metab.* **2020**, *3*, e00150.
31. Poret, F.; Nacher, M.; Pujo, J.; Cauvin, J.M.; Demar, M.; Massicard, M.; Sabbah, N. Risk factors for hypoglycaemia in people with diabetes admitted to the Emergency Department of a Hospital in French Guiana. *Diabet. Med.* **2022**, *39*, e14736.
32. Liatis, S.; Mylona, M.; Kalopita, S.; Papazafiropoulou, A.; Karamagkiolis, S.; Melidonis, A.; Xilomenos, A.; Ioannidis, I.; Kaltsas, G.; Lanaras, L. Hypoglycaemia requiring medical assistance in patients with diabetes: a prospective multicentre survey in tertiary hospitals. *Diabetes Metab.* **2015**, *41*, 126–131.
33. Park, S.-Y.; Jang, E.J.; Shin, J.-Y.; Lee, M.-Y.; Kim, D.; Lee, E.-K. Prevalence and predictors of hypoglycemia in South Korea. *Am J Manag Care* **2018**, *24*, 278–286.
34. Bengtson, M.B.; Knudsen, J.S.; Bengtson, M.B.; Møller, N.; Thomsen, R.W. Hospitalization for hypoglycaemia in people with diabetes in Denmark, 1997 – 2017: Time trends in incidence and HbA1c and glucose - lowering drug use before and after hypoglycaemia. *Endocrinol. Diabetes Metab.* **2021**, *4*, e00227.

**Disclaimer/Publisher's Note:** The statements, opinions and data contained in all publications are solely those of the individual author(s) and contributor(s) and not of MDPI and/or the editor(s). MDPI and/or the editor(s) disclaim responsibility for any injury to people or property resulting from any ideas, methods, instructions or products referred to in the content.
